# Supplementary material for: Palladium(ii) diamine complex induces reduction of glutathione disulfide
Source: Royal Society of Chemistry journal article supplement (doi:10.1039/b408151j), 2004-01-01
Supplement: b408151j.pdf [file b408151j.pdf]

## Supplementary data

### **Palladium(II) diamine complex induces reduction of glutathione disulfide**

**Vivienne P. Munk and Peter J. Sadler\***

*School of Chemistry, University of Edinburgh, West Mains Road, Edinburgh, UK, EH9 3JJ*

### **Experimental**

[Pd(1*R*,2*R*-dach)Cl<sub>2</sub>] was synthesised following adapted published procedures (D. S. Gill in “Platinum coordination complexes in cancer chemotherapy: Proceedings of the 4<sup>th</sup> International Symposium on Platinum Coordination Complexes in Cancer Chemotherapy”, Vermont, 1983. Ed. M.P.Hacker, E.B.Double and I.H.Krakoff, Martinus Nijhoff Publishing, Boston, p268). K<sub>2</sub>PdCl<sub>4</sub> (Johnson Matthey Chemicals, 0.50 g, 1.5 mmol) and 1*R*,2*R*-dach (Sigma Aldrich, 0.17 g, 1.5 mmol) were reacted in the dark for 3 hours at 328 K in a 0.5 mM NaOH solution. The resulting dark yellow solid was filtered off, washed with cold water and dried over silica. Yield: 0.39 g, 71%. Found: C, 23.99; H, 4.24; N, 9.55. Calc.: C, 24.72; H, 4.84; N, 9.61.

**Table S1** <sup>1</sup>H NMR chemical shifts (ppm) for GSSG and product **3** in 90% H<sub>2</sub>O/ 10% D<sub>2</sub>O, pH 7, 298 K. For proton labels, see Figure S1.

| Residue                               | Proton | δ <sup>1</sup> H /ppm |                                                    |                   |
|---------------------------------------|--------|-----------------------|----------------------------------------------------|-------------------|
|                                       |        | GSSG                  | {Pd(1 <i>R</i> ,2 <i>R</i> -dach)} <sup>2+</sup> * | <b>3</b>          |
| Gly                                   | NH     | 8.26                  | -                                                  | - <sup>a</sup>    |
|                                       | H(α)   | 3.75 <sup>c</sup>     | -                                                  | -                 |
| Cys                                   | NH     | 8.57                  | -                                                  | 8.43              |
|                                       | H(α)   | - <sup>b</sup>        | -                                                  | 5.38              |
|                                       | H(β)   | 2.95, 3.29            | -                                                  | 3.53, 3.73        |
| γ-Glu                                 | NH     | - <sup>a</sup>        | -                                                  | - <sup>a</sup>    |
|                                       | H(α)   | 3.75                  | -                                                  | 3.65              |
|                                       | H(β)   | 2.13 <sup>c</sup>     | -                                                  | 2.09, 2.22        |
|                                       | H(γ)   | 2.52 <sup>c</sup>     | -                                                  | 2.55 <sup>c</sup> |
| {Pd(1 <i>R</i> ,2 <i>R</i> -dach)}-NH | A      | -                     | 4.93                                               | 4.89              |
|                                       | B      | -                     | 4.27                                               | 4.37              |
|                                       | C      | -                     | 4.69                                               | 4.48              |
|                                       | D      | -                     | 5.20                                               | 4.93              |
| {Pd(1 <i>R</i> ,2 <i>R</i> -dach)}-CH | a      | -                     | 1.11                                               | 1.10              |
|                                       | b      | -                     | 1.26                                               | 1.22              |
|                                       | c      | -                     | 1.64                                               | 1.60              |
|                                       | d      | -                     | 2.02                                               | 1.98              |
|                                       | e/f    | -                     | 2.48                                               | 2.45 <sup>c</sup> |

<sup>a</sup> not observed ; <sup>b</sup> under residual water peak ; <sup>c</sup> although non-equivalent protons, peaks overlap

\* complex hydrolyses in water

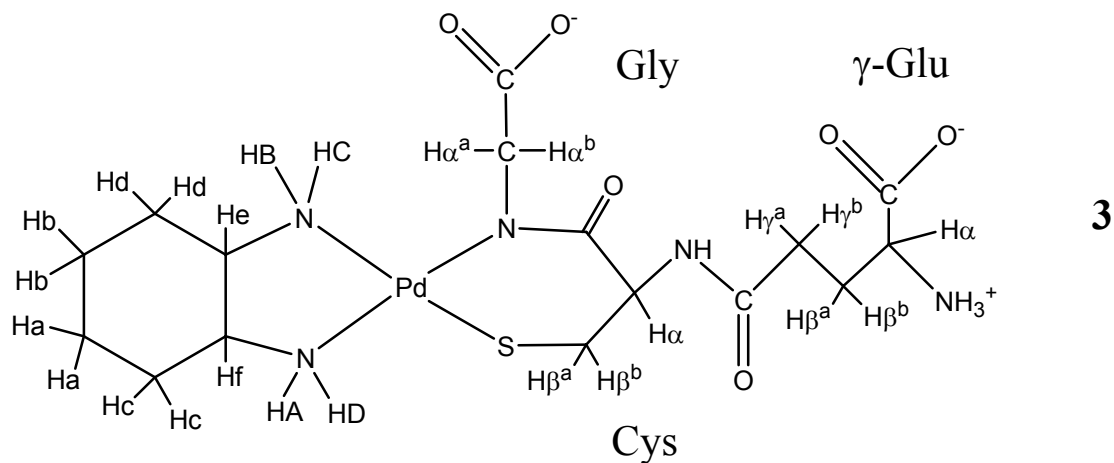

**Fig. S1** Structure of **3** and numbering scheme

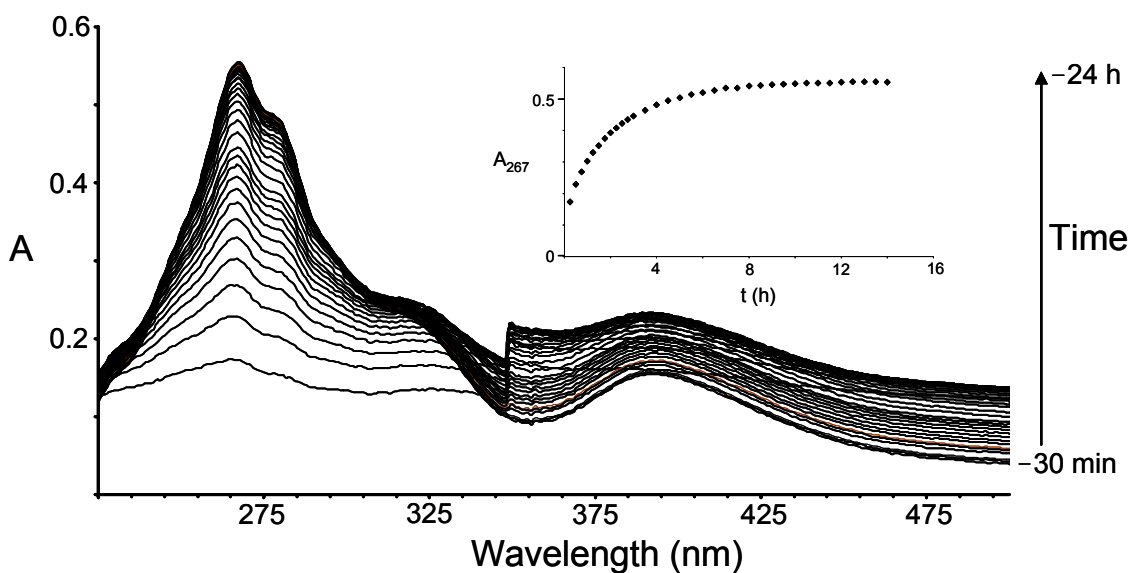

**Figure S2** Uv-vis spectra recorded during the reaction of  $[\text{Pd}(1R,2R\text{-dach})\text{Cl}_2]$  (0.1 mM) with GSH (0.2 mM) at pH 7, 310 K. Spectra were recorded every 30 min. The inset shows the variation in  $A_{267}$  with time.

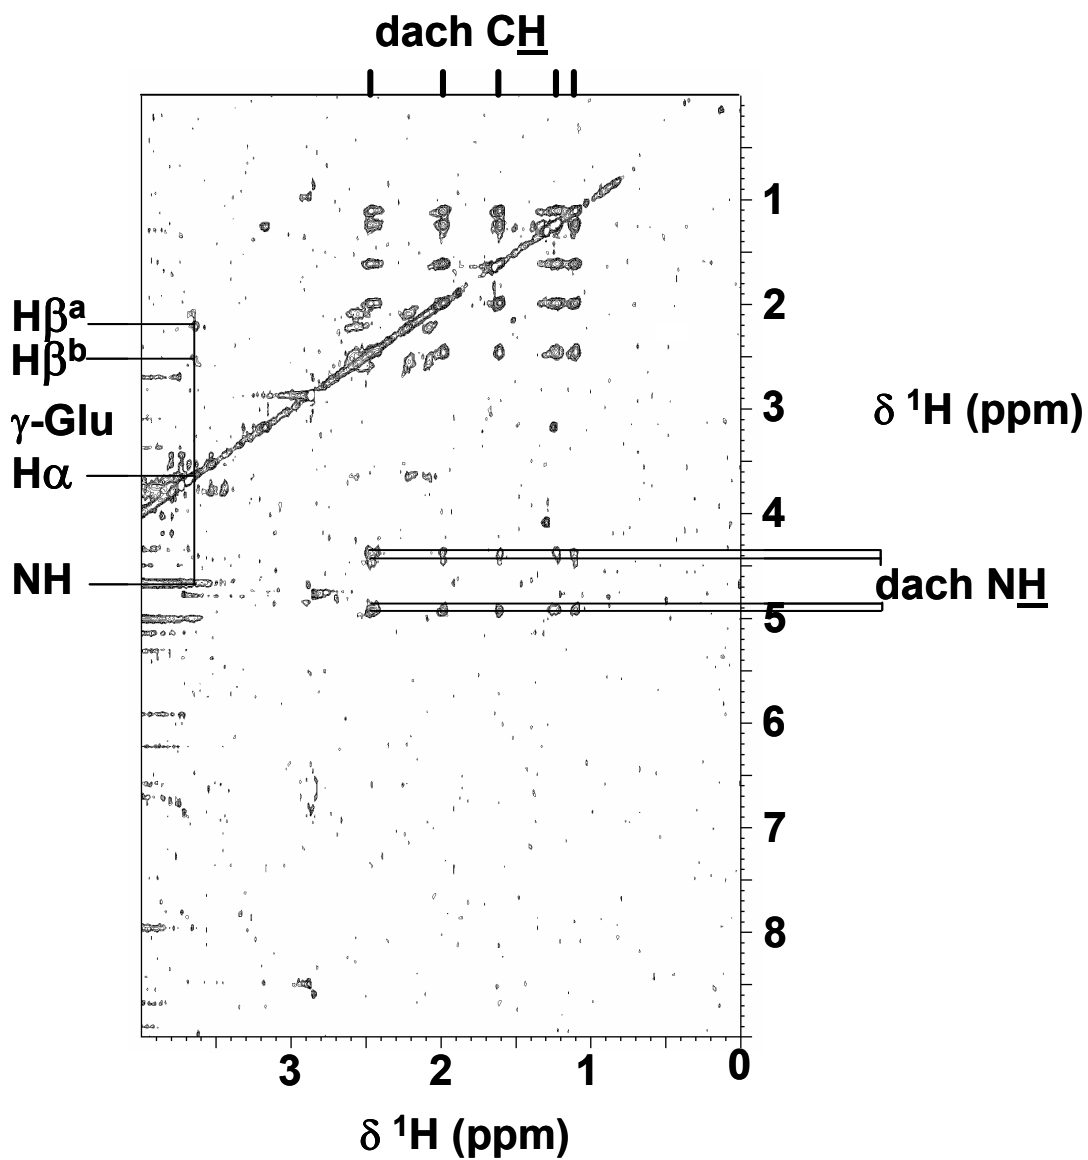

**Figure S3** 800 MHz 2D TOCSY <sup>1</sup>H NMR spectrum of **3** in H<sub>2</sub>O/D<sub>2</sub>O (90:10), 298 K.

For proton labelling, see Figure S1.
